# Supplementary material for: Migration on digital news platforms: Using large-scale digital text analysis and time-series to estimate the effects of socioeconomic data on migration content
Source: publisher site journal article supplement (doi:10.1515/commun-2024-0011), 2025-02-21
Supplement: Supplementary file 1 [file Simonsen_appendix.docx]

**Appendix**

**Dictionaries**

*Migration*

migration indvandr* andengenerationsindvandr* tredjegenerationsindvandr* migrant* ”dansk muslim” ”danske muslimer” multikultur* parallelsamfund* nydansk* ikkevestlig* minoritetsbaggrund ”etniske minoriteter” ”anden etnisk baggrund” asylansøger*

*Threat*

truer trussel fremtid skade* underminere* stigning* risik* ”dårlig udvikling” ”negativ udvikling” overrepræsent* dårlig* ”ikke godt” skidt problem* vokse* problem* frygt

*Security*

politi politiet politibetjent* efterretningstjeneste* pet ”islamisk stat” is-kriger* syrienskriger* bande* indvandrerbande* indvandrerdrenge* mistænkt* gerningsm* kriminalitet* utryghedsskabende utilpasse* terror* utryghed* sikkerhed* usikkerhed* uroplag* undtagelsestilstand* gerningssted* patruljevogn* våben* pistol* skud* skydevåben* økse* kniv* bilbrand bilafbrændinger containerbrand containerafbrændinger voldelig* mord* dræb* skud* skyderi* knivdrab* overfald* voldtægt* gruppeoverfald* gruppevoldtægt* berigelseskriminalitet attentat* hærværk stenkast* hashhandel* narkohandel*) NOT (thailand usa kina gaddafi* mexico trump grønland mulberry susan oprørere)

*Economy*

arbejdsløshed* beskæftigelse* jobcenter* ledig* kontanthjælpsmodtager* fattigdomsflygtning* dagpengemodtager* ”offentligt forsørgede” udgifter* ”økonomisk byrde” ydelse* understøttelse* overførselsindkomst* beskæftigelse statskassen dagpenge kontanthjælp førtidspension* arbejdsløshedsunderstøttelse NOT (kina shanghai dronningen usa polen østeuropæisk* spanien redningspakke)

*Culture*

islam* lovreligion sharia* sharia-domstole radikaliser* fundamental* ekstrem* formørk* antidemokratisk* rettro* særkrav* halal* ”opdelt svømning” omskæring kønsligestilling* kvindesyn kvindeundertryk* patriarkalsk* mandsdominerende tvangsægteskab* tvangsgift ”arrangeret ægteskab” ”arrangerede ægteskaber” genopdragelsesrejse barnebrud* jødehad jødeforfølgelse antisemit* multikultur* multietnisk assimi* globalisering demografi* befolkningssammensætning polarisering* kultur* værdier demokrati normer* traditioner æres* demografi* ytringsfrihed* homogen* sammenhængskraft* danskhed* frihedskamp* kulturkrig* modstandskamp* ”vestlige værdier” ”danske værdier” koran* tørklæde* niqab* hijab* burka* badeforhæng svinekød frikadeller allah profet* ”profeten mohammed” ”profeten muhammed” imam* moske* bedehuse* bederum parallelsamfund* ”muslimske friskoler” NOT (islamabad ”islamisk stat” hamas redox indsamling kinesisk dronningen tysk* madoplevelser venedig indonesi* usa kina polen populisme)
